# Supplementary material for: A signal transduction score flow algorithm for cyclic cellular pathway analysis, which combines transcriptome and ChIP-seq data
Source: Royal Society of Chemistry journal article supplement (doi:10.1039/c2mb25215e), 2012-09-11
Supplement: c2mb25215e_3.pdf [file c2mb25215e_3.pdf]

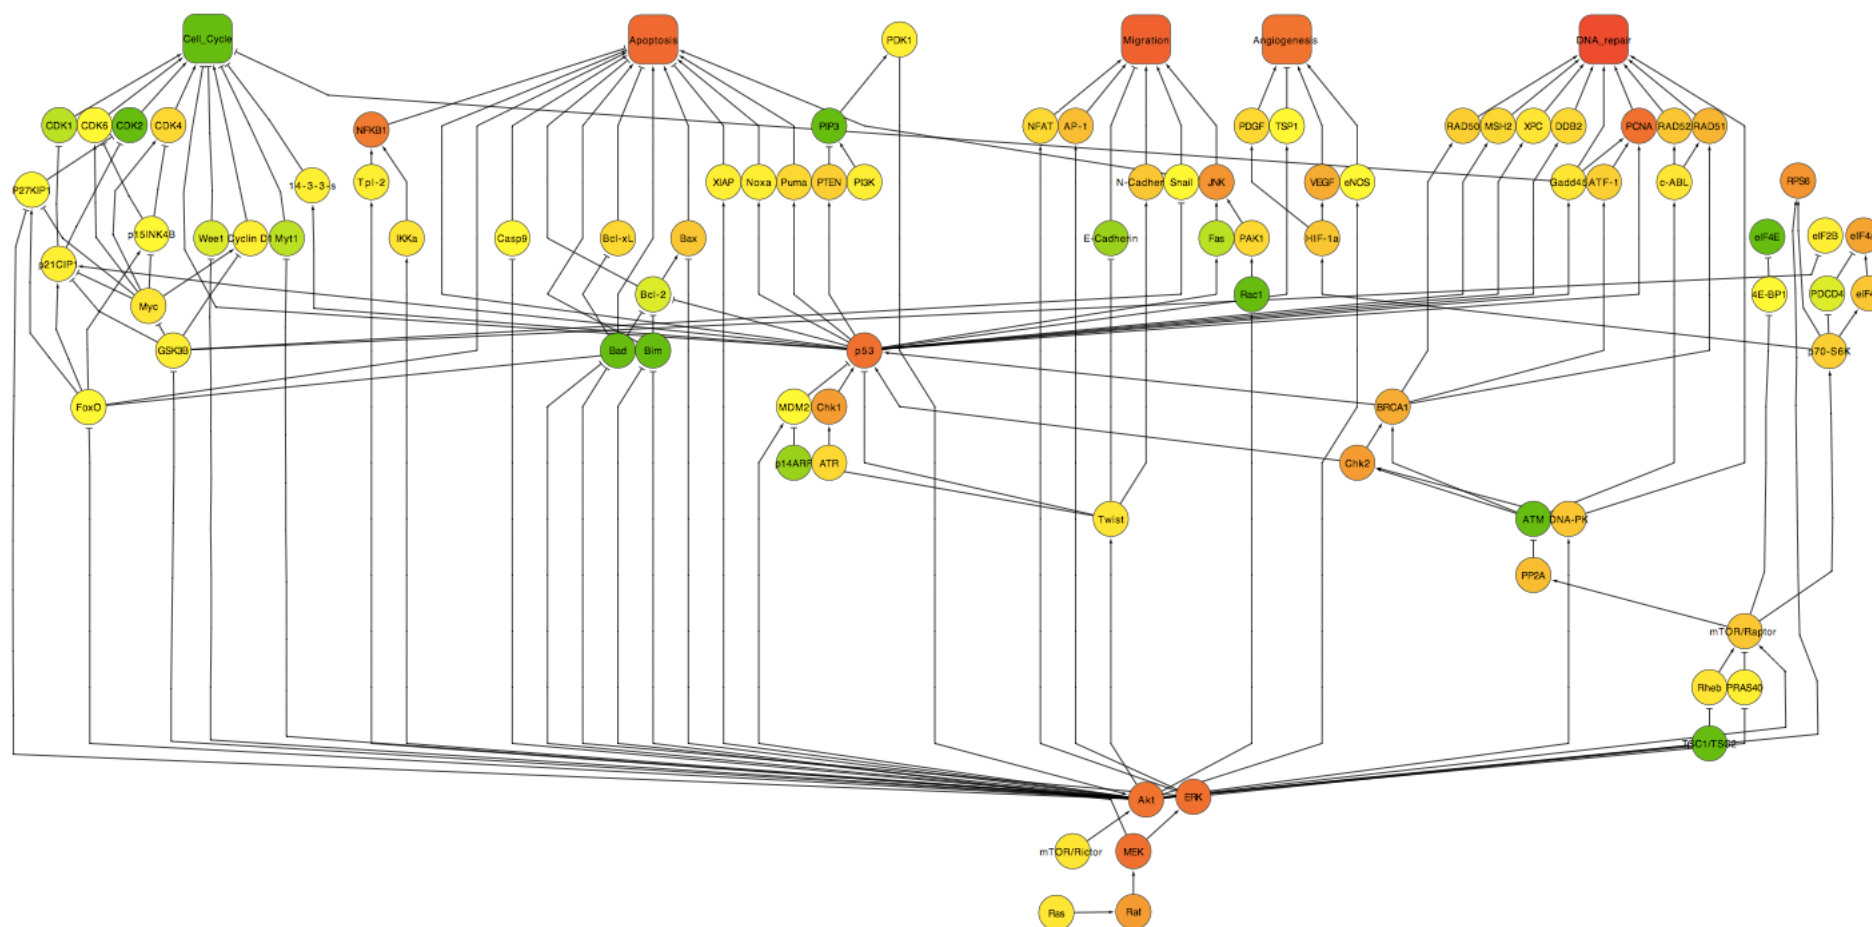

**Supplementary Fig 1.** Activity scores of genes and processes in original PI3K/Akt pathway by using Colo741-Ras (wt). Down-regulated and up-regulated genes and processes are represented in colour tones of green and red, respectively.
