# Supplementary material for: A signal transduction score flow algorithm for cyclic cellular pathway analysis, which combines transcriptome and ChIP-seq data
Source: Royal Society of Chemistry journal article supplement (doi:10.1039/c2mb25215e), 2012-09-11
Supplement: c2mb25215e_4.pdf [file c2mb25215e_4.pdf]

**Supplementary Table 1:** SPIA results on Colo741-KRas2 microarray data using control vs. G12D mutation.

The fold-change ratios of the control vs. G12D sets were computed and used as an input to SPIA. Using 5% cut off of the FDR-adjusted *p*-values, SPIA was unable find any significant pathway in the KEGG database. The FDR values with the Colo741-KRas2 dataset are around 34-35%, which is not significant according to authors.

| Pathway Name                          | KEGG ID  | FDR    | Status    |
|---------------------------------------|----------|--------|-----------|
| Leishmaniasis                         | Hsa05140 | 0.3433 | Activated |
| Pathogenic Escherichia coli infection | Hsa05130 | 0.3433 | Activated |
| p53 signaling pathway                 | Hsa04115 | 0.3433 | Activated |
| Cytosolic DNA-sensing pathway         | Hsa04623 | 0.3433 | Inhibited |
| Vibrio cholerae infection             | Hsa05110 | 0.3433 | Inhibited |
| Maturity onset diabetes of the young  | Hsa04950 | 0.3433 | Inhibited |
| Cell cycle                            | Hsa04110 | 0.3433 | Inhibited |
| Shigellosis                           | Hsa05131 | 0.3433 | Activated |
| Focal adhesion                        | Hsa04510 | 0.3509 | Inhibited |
